# Supplementary material for: Variation of Gut Microbiome in Free-Ranging Female Tibetan Macaques (Macaca thibetana) across Different Reproductive States
Source: PubMed Central journal article supplement (PMC7823274; doi:10.3390/ani11010039), 2020-12-27
Supplement: animals-11-00039-s001.pdf [file animals-11-00039-s001.pdf]

**Table S1.** Summary of of sample information.

| Animal ID | Samples ID | Age Group*   | Reproductive State | Season |
|-----------|------------|--------------|--------------------|--------|
| HH        | 3          | Middle adult | Lactating          | Autumn |
| HH        | 25         | Middle adult | Lactating          | Summer |
| TH        | 9          | Middle adult | Lactating          | Autumn |
| TH        | 19         | Middle adult | Lactating          | Summer |
| THY       | 1          | Yong adult   | Cycling            | Autumn |
| THY       | 2          | Yong adult   | Pregnant           | Winter |
| THY       | 8          | Yong adult   | Pregnant           | Autumn |
| THY       | 14         | Yong adult   | Lactating          | Spring |
| THY       | 20         | Yong adult   | Cycling            | Summer |
| TR        | 12         | Middle adult | Cycling            | Spring |
| TR        | 16         | Middle adult | Cycling            | Spring |
| TR        | 22         | Middle adult | Lactating          | Summer |
| TRYu      | 4          | Yong adult   | Pregnant           | Winter |
| TRYu      | 5          | Yong adult   | Lactating          | Autumn |
| TRYu      | 11         | Yong adult   | Pregnant           | Spring |
| TT        | 10         | Old          | Lactating          | Autumn |
| TT        | 17         | Old          | Cycling            | Spring |
| TXH       | 7          | Yong adult   | Lactating          | Autumn |
| TXH       | 15         | Yong adult   | Pregnant           | Spring |
| TXH       | 24         | Yong adult   | Lactating          | Summer |
| TXX       | 6          | Yong adult   | Pregnant           | Autumn |
| TXX       | 13         | Yong adult   | Lactating          | Spring |

|     |    |              |           |        |
|-----|----|--------------|-----------|--------|
| TXX | 23 | Yong adult   | Cycling   | Summer |
| YCY | 18 | Yong adult   | Lactating | Summer |
| YH  | 21 | Middle adult | Lactating | Summer |

---

\* Definition of age groups: Yong adult ( $\geq 5$  ~10 years old), Middle adult ( $\geq 10$  ~15 years old), Old ( $\geq 15$  years old).

**Table S2.** Age, season and reproductive status associated with predominant phylum and alpha diversity based on linear mixed models.

| Response variable      | Fixed effect                     |                                                 |                                  |                                                          | Random effect             |
|------------------------|----------------------------------|-------------------------------------------------|----------------------------------|----------------------------------------------------------|---------------------------|
|                        | Age<br>(df1, df2; F,<br>P_value) | Reproductive state<br>(df1, df2; F,<br>P_value) | Season<br>(df1, df2; F, P_value) | Reproductive state<br>* Season (df1, df2;<br>F, P_value) | Animal ID<br>(Z, P_value) |
| <b>Alpha diversity</b> |                                  |                                                 |                                  |                                                          |                           |
| ASVs                   | 2, 9; 0.622, 0.558               | 2, 12; 1.291, 0.312                             | 3, 11; 2.667, 0.098              | 3, 11; 2.990, 0.076                                      | 0.587, 0.557              |
| Shannon                | 2, 9; 0.045, 0.956               | 2, 12; 1.134, 0.335                             | 3, 11; 2.500, 0.112              | 3, 11; 0.651, 0.598                                      | 0.468, 0.963              |
| <b>Phylum</b>          |                                  |                                                 |                                  |                                                          |                           |
| Firmicutes             | 2, 9; 0.550, 0.595               | 2, 12; 0.385, 0.688                             | 3, 12; 1.639, 0.233              | 3, 11; 0.553, 0.657                                      | 0.139, 0.889              |
| Bacteroidetes          | 2, 14; 0.113, 0.894              | 2, 14; 6.155, <b>0.012</b>                      | 3, 14; 3.050, 0.064              | 3, 14; 0.331, 0.803                                      | NA                        |
| Proteobacteria         | 2, 9; 0.411, 0.5657              | 2, 12; 5.508, <b>0.020</b>                      | 3, 12; 1.254, 0.335              | 3, 11; 0.049, 0.985                                      | 0.401, 0.688              |
| F/B                    | 2, 14; 0.531, 0.599              | 2, 14; 1.034, 0.381                             | 3; 14; 1.252, 0.329              | 3, 14; 0.167, 0.917                                      | NA                        |

Note, F/B means the ratio of Firmicutes to Bacteroidetes, Significantly level at the 0.05. NA: not possible to estimate because of the parameter redundancy.

**Table S3.** Differences in the bacterial community composition based on the similarity test of Adonis.

| Metrics            | Treatment             | Adonis tests |                |                  |
|--------------------|-----------------------|--------------|----------------|------------------|
|                    |                       | F            | R <sup>2</sup> | Adjusted p_value |
| Unweighted Unifrac | Cycling vs lactating  | 1.730        | 0.092          | 0.087            |
|                    | Cycling vs pregnant   | 1.150        | 0.103          | 0.256            |
|                    | Lactating vs Pregnant | 1.6013       | 0.086          | 0.094            |
| Weighted Unifrac   | Cycling vs lactating  | 3.575        | 0.174          | 0.003            |
|                    | Cycling vs pregnant   | 2.280        | 0.186          | 0.014            |
|                    | Lactating vs Pregnant | 0.657        | 0.0372         | 0.742            |

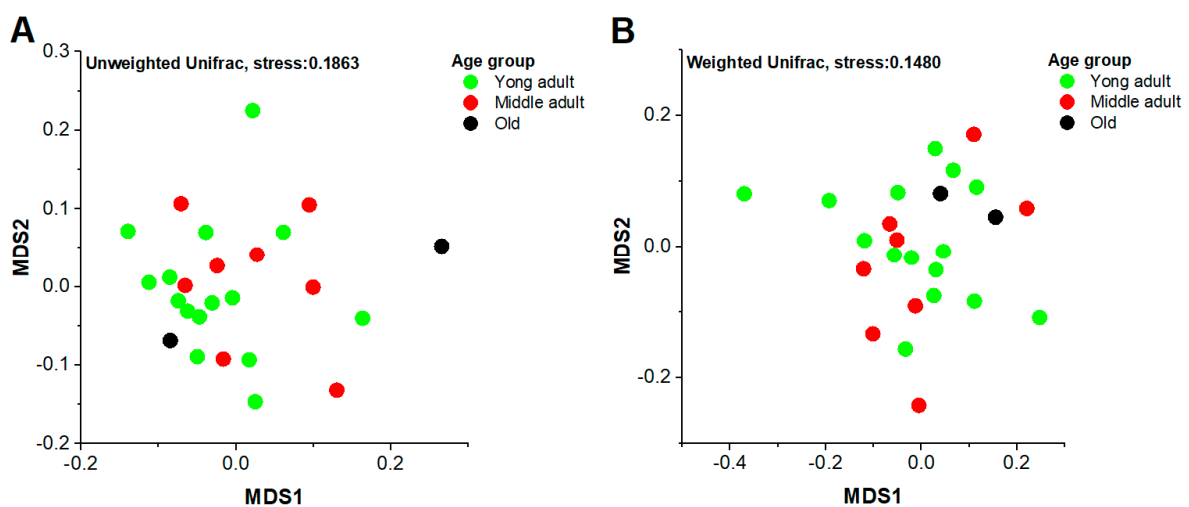

**Figure S1.** Differentiation of gut microbiome structure across age groups. The analysis is based on the OTU level. NMDS was used to show differentiation patterns of the age groups (A, unweighted; Unifrac; B, weighted Unifrac).
